# Supplementary material for: Morphology and Molecular Phylogeny of the Genus Stigeoclonium (Chaetophorales, Chlorophyta) from China, Including Descriptions of the Pseudostigeoclonium gen. nov.
Source: MDPI journal article supplement (doi:10.3390/plants13050748), 2024-03-06
Supplement: s1 [file s1]

**Table S1.** The newly obtained voucher number, taxon, collection information and their GenBank accession numbers of Chaetophorales used for 18S rDNA, ITS2 and tufA sequence analyses.

| Voucher number | Taxon                             | Isolator, isolation data and collection information                                                                                         | GenBank accession number |          |          |
|----------------|-----------------------------------|---------------------------------------------------------------------------------------------------------------------------------------------|--------------------------|----------|----------|
|                |                                   |                                                                                                                                             | 18S rDNA                 | ITS2     | tufA     |
| bmA10          | <i>Stigeoclonium</i> sp.          | B. W. Liu, 2016, Xizang, China, on the stones in a stream, freshwater.                                                                      | MK250079                 | MN428038 | MN699101 |
| HB201714       | <i>Stigeoclonium</i> sp.          | B. W. Liu, 2017, Wuhan, Hubei province, China, on the sticks in a still water, freshwater.                                                  | OP236760                 | OP243338 | OP263076 |
| HB201512       | <i>Chaetophoropsis polyrhizum</i> | B. W. Liu, 2015, Suizhou, Hubei province, China, on rocks in a trench, stagnant water, freshwater.                                          | MH002620                 | MH002620 | MW46850  |
| HN201708       | <i>Stigeoclonium</i> sp.          | B. W. Liu, 2017, Hengyang, Hunan province, China, at the water pipe outlet, freshwater.                                                     | OP236759                 | OP243337 | MW46853  |
| HB201705       | <i>Stigeoclonium</i> sp.          | B. W. Liu, 2017, Wuhan, Hubei province, China, on floating leaves in East Lake, freshwater.                                                 | OP236758                 | OP243336 | MW46852  |
| JX201714       | <i>Stigeoclonium</i> sp.          | B. W. Liu, 2017, Nanchang, Jiangxi province, China, Nanchang University, on the stones in a stream, freshwater.                             | OP236769                 | OP243348 | MW46854  |
| JX201712       | <i>Chaetophoropsis attenuata</i>  | B. W. Liu, 2017, Nanchang, Jiangxi province, China, Nanchang University, on the stones in a stream, freshwater.                             | OP236768                 | OP243347 | MW46849  |
| JX201710       | <i>Stigeoclonium lubricum</i>     | B. W. Liu, 2017, Ruijin, Jiangxi province, China, on the fishing net in a river, freshwater.                                                | OP236767                 | OP243346 | MW46852  |
| HB201502       | <i>Chaetophoropsis polyrhizum</i> | B. W. Liu, 2015, Wuhan, Hubei province, China, Wuhan Botanical Garden, Chinese Academy of Sciences, on water grasses in a pool, freshwater. | MH002619                 | MH002619 | MW46850  |
| JX201707       | <i>Stigeoclonium amoenum</i>      | B. W. Liu, 2017, Ruijin, Jiangxi province, China, on the stonges in a river, freshwater.                                                    | OP236767                 | OP243345 | MW46851  |
| JX201701       | <i>Stigeoclonium amoenum</i>      | B. W. Liu, 2017, Huichang, Jiangxi province, China, on water grasses in a river, freshwater.                                                | OP236765                 | OP243344 | MW46851  |
| GXGL201705     | <i>Stigeoclonium variabile</i>    | B. W. Liu, 2017, Guilin, Guangxi province, China, on the walls of water pipes in a hot spring well, freshwater.                             | OP236745                 | OP243324 | MW46857  |

|          |                                   |                                                                                                                                                 |          |          |              |
|----------|-----------------------------------|-------------------------------------------------------------------------------------------------------------------------------------------------|----------|----------|--------------|
| HB201649 | <i>Stigeoclonium</i> sp.          | B. W. Liu, 2016, Wuhan, Hubei province, China, Wuhan Botanical Garden, Chinese Academy of Sciences, on a plastic bags in a pool, freshwater.    | OP236757 | OP243335 | MW46853<br>0 |
| HB201646 | <i>Chaetophoropsis polyrhizum</i> | B. W. Liu, 2016, Wuhan, Hubei province, China, Wuhan Botanical Garden, Chinese Academy of Sciences, on water grasses in a pool, freshwater.     | MH002621 | MH002621 | MN701587     |
| HB201639 | <i>Stigeoclonium helveticum</i>   | B. W. Liu, 2016, Wuhan, Hubei province, China, on a waterweed stems in the Yangtze River, freshwater.                                           | OP236756 | OP243353 | MW46855<br>3 |
| HB201638 | <i>Stigeoclonium</i> sp.          | B. W. Liu, 2016, Wuhan, Hubei province, China, Wuhan Botanical Garden, Chinese Academy of Sciences, on water grasses in a pool, freshwater.     | OP236755 | OP243334 | MW46854<br>0 |
| HB201636 | <i>Chaetophoropsis</i> sp.        | B. W. Liu, 2016, Wuhan, Hubei province, China, Wuhan Botanical Garden, Chinese Academy of Sciences, on the bamboo slices in a pool, freshwater. | OP236754 | OP243333 | MW46850<br>0 |
| HB201635 | <i>Stigeoclonium</i> sp.          | B. W. Liu, 2016, Wuhan, Hubei province, China, Wuhan Botanical Garden, Chinese Academy of Sciences, on the stick in a pool, freshwater.         | MK250081 | MN428036 | MN701166     |
| HB201631 | <i>Stigeoclonium</i> sp.          | B. W. Liu, 2016, Wuhan, Hubei province, China, Wuhan Botanical Garden, Chinese Academy of Sciences, on the leaves in a pool, freshwater.        | OP236753 | OP243332 | MW46851<br>4 |
| YN201601 | <i>Stigeoclonium</i> sp.          | B. W. Liu, 2016, Yuxi, Yunnan province, China, on the rocks on the shore beaten by fine waves in the Fuxian Lake Scenic Area, freshwater.       | OP236775 | OP243354 | MW46851<br>1 |
| HB201627 | <i>Stigeoclonium aestivale</i>    | B. W. Liu, 2016, Wuhan, Hubei province, China, Wuhan Botanical Garden, Chinese Academy of Sciences, on the stick in a pool, freshwater.         | OP236752 | OP243331 | MW46851<br>9 |
| HB201811 | <i>Stigeoclonium</i> sp.          | B. W. Liu, 2018, Wuhan, Hubei province, China, Wuhan Botanical Garden, Chinese Academy of Sciences, on the stick in a pool,                     | OP236764 | OP243343 | MW46858<br>6 |

|            |                                  |                                                                                                                                                      |          |          |              |
|------------|----------------------------------|------------------------------------------------------------------------------------------------------------------------------------------------------|----------|----------|--------------|
|            |                                  | freshwater.                                                                                                                                          |          |          |              |
| HB201617   | <i>Stigeoclonium</i> sp.         | B. W. Liu, 2016, Huanggang, Hubei province, China, on the rock in a stream, freshwater.                                                              | OP236751 | OP243330 | MW46852<br>7 |
| HB201611   | <i>Stigeoclonium</i> sp.         | B. W. Liu, 2016, Wuhan, Hubei province, China, on the stick in a stream, freshwater.                                                                 | OP236750 | OP243329 | OP263075     |
| HB201644F  | <i>Chaetophoropsis attenuata</i> | B. W. Liu, 2016, Wuhan, Hubei province, China, Wuhan Botanical Garden, Chinese Academy of Sciences, on the stick in a pool, freshwater.              | MH002616 | MH002626 | MN701985     |
| HB201809   | <i>Stigeoclonium</i> sp.         | B. W. Liu, 2018, Wuhan, Hubei province, China, Wuhan Botanical Garden, Chinese Academy of Sciences, at the bottom of running water tank, freshwater. | OP236763 | OP243342 | MW46858<br>5 |
| WDLC201608 | <i>Stigeoclonium helveticum</i>  | B. W. Liu, 2016, Wudalianchi, Heilongjiang province, China, on the rock in a stream, freshwater.                                                     | OP247563 | OP243350 | MW46855<br>4 |
| HB201602   | <i>Stigeoclonium</i> sp.         | B. W. Liu, 2016, Wuhan, Hubei province, China, on the rock of East Lake, freshwater.                                                                 | OP236749 | OP243328 | MW46854<br>8 |
| HB201601   | <i>Stigeoclonium helveticum</i>  | B. W. Liu, 2016, Wuhan, Hubei province, China, on leather shoes impacted by sewage, freshwater.                                                      | OP236748 | OP243327 | MW46855<br>0 |
| HB201600   | <i>Stigeoclonium</i> sp.         | B. W. Liu, 2016, Xianning, Hubei province, China, on the stones impacted by sewage, freshwater.                                                      | OP236747 | OP243326 | OP263074     |
| LY201701   | <i>Uronema confervicolum</i>     | B. W. Liu, 2017, Luoyang, Henan province, China, on water grasses in a river, freshwater.                                                            | MK250084 | MN428033 | MN701586     |
| TB201650   | <i>Stigeoclonium</i> sp.         | B. W. Liu, 2016, Xizang, China, on the stones in a stream, freshwater.                                                                               | OP236771 | OP256564 | OP263077     |
| HB201735   | <i>Stigeoclonium</i> sp.         | B. W. Liu, 2017, Huanggang, Hubei province, China, on the stones in a ditch, freshwater.                                                             | OP247562 | OP243341 | MW46854<br>5 |
| HB201730   | <i>Stigeoclonium</i> sp.         | B. W. Liu, 2016, Yichang, Hubei province, China, on the stones in a stream, freshwater.                                                              | OP236762 | OP243340 | MW46851<br>3 |
| TB201638   | <i>Stigeoclonium</i> sp.         | B. W. Liu, 2016, Xizang, China, on the stones in a stream, freshwater.                                                                               | OP236770 | OP243349 | MW46852<br>9 |

|           |                                     |                                                                                                                                                    |          |          |              |
|-----------|-------------------------------------|----------------------------------------------------------------------------------------------------------------------------------------------------|----------|----------|--------------|
| HB201721  | <i>Stigeoclonium</i> sp.            | B. W. Liu, 2017, Wuhan, Hubei province, China, Wuhan Botanical Garden, Chinese Academy of Sciences, on leaves of aquatic plants, still freshwater. | OP236761 | OP243339 | MW46853<br>4 |
| HB201509F | <i>Stigeoclonium</i> sp.            | B. W. Liu, 2015, Wuhan, Hubei province, China, on the rock of East Lake, freshwater.                                                               | OP236746 | OP243325 | OP263073     |
| AES201708 | <i>Chaetophoropsis aershanensis</i> | B. W. Liu, 2017, Aershan, Hinggan, Inner mongolia province, China, on the stones in Halaha river, freshwater.                                      | MH002611 | MH002622 | OP263071     |
| GD201802  | <i>Stigeoclonium</i> sp.            | B. W. Liu, 2018, Qingyuan, Guangdong province, China, on the rock in a stream, freshwater.                                                         | OP236743 | OP243322 | OP263072     |
| GD201805  | <i>Stigeoclonium</i> sp.            | B. W. Liu, 2018, Guangzhou, Guangdong province, China, on the rock in a stream, freshwater.                                                        | OP236744 | OP243323 | MW46858<br>7 |
| YJ201801  | <i>Stigeoclonium</i> sp.            | B. W. Liu, 2018, Yuanjiang, Hunan province, China, on the rock of Dongting Lake, freshwater.                                                       | OP236772 | OP243351 | MW46859<br>2 |
| YJ201802F | <i>Stigeoclonium</i> sp.            | B. W. Liu, 2018, Yuanjiang, Hunan province, China, on the rock of Dongting Lake, freshwater.                                                       | OP236773 | OP243352 | MW46859<br>3 |
| YJ201806  | <i>Stigeoclonium</i> sp.            | B. W. Liu, 2018, Yuanjiang, Hunan province, China, on sanbar of Dongting Lake, on the moist soil, freshwater.                                      | OP236774 | -        | MW46859<br>4 |
| HB201823  | <i>Fritschiella tuberosa</i>        | B. W. Liu, 2018, Wuhan, Hubei province, China, sanbar of Yangtze River, on the moist soil.                                                         | MN428041 | MN428042 | MN701160     |
| AES201713 | <i>Draparnaldia mutabilis</i>       | B. W. Liu, 2017, Aershan, Hinggan, Inner mongolia province, China, on the stones in Halaha river, freshwater.                                      | MK250078 | MN428039 | MN659372     |
